1 **Slipped strand mispairing in the gene encoding cell wall associated sialidase**

2 **NanH3 in *Gardnerella* spp.**

3

4 Shakya P. Kurukulasuriya, Mo H. Patterson, Janet E. Hill<sup>#</sup>

5

6 Department of Veterinary Microbiology, University of Saskatchewan, Saskatoon, Canada

7

8 Running head: Slipped-strand mispairing in *Gardnerella* sialidase

9

10 <sup>#</sup>Address correspondence to Janet E. Hill, [Janet.Hill@usask.ca](mailto:Janet.Hill@usask.ca)

11

12

13 **Abstract**

14 Cell wall proteins with sialidase activity are involved in carbohydrate assimilation, adhesion to  
15 mucosal surfaces, and biofilm formation. *Gardnerella* spp. inhabit the human vaginal  
16 microbiome and encode up to three sialidase enzymes, two of which are cell wall associated.  
17 Here we demonstrate that the gene encoding extracellular sialidase NanH3 is found almost  
18 exclusively in *G. piotii* and closely related *Gardnerella* genome sp. 3, and its presence correlates  
19 with sialidase positive phenotype in a collection of 112 *Gardnerella* isolates. The *nanH3* gene  
20 sequence includes a homopolymeric repeat of cytosines that varies in length within cell  
21 populations, indicating that this gene is subject to slipped-strand mispairing, a mechanisms of  
22 phase variation in bacteria. Variation in the length of the homopolymer sequence results in  
23 encoding of either the full length sialidase protein or truncated peptides due to introduction of  
24 reading-frame shifts and premature stop codons. Phase variation in this extracellular, cell wall  
25 associated sialidase may be involved in immune evasion or modulation of adhesion to host  
26 epithelial cells, and formation of biofilms characteristic of the vaginal dysbiosis known as  
27 bacterial vaginosis.

28

## 29 **Introduction**

30 Bacterial vaginosis (BV) is a condition that is characterized by altered composition of the  
31 vaginal microbiota and occurs when the healthy microbiota is replaced by an overgrowth of  
32 mixed aerobic and anaerobic species, including *Gardnerella* spp. (1). An abundance of  
33 *Gardnerella* spp. is often found in cases of symptomatic BV, although they are also found in  
34 healthy women with no clinical signs or symptoms of BV (2). *Gardnerella* spp. can be resolved  
35 into four subgroups based on cpn60 barcodes sequencing (3) or whole genome sequencing (4).  
36 Recently, the description of *Gardnerella vaginalis* was amended and three new species were  
37 defined within the genus *Gardnerella*: *G. leopoldii*, *G. swidsinskii*, and *G. piovii* (5). *G. piovii* and  
38 *G. vaginalis* correspond to cpn60 subgroup B and C, respectively. *G. leopoldii* and *G. swidsinskii*  
39 were previously grouped together as subgroup A based on cpn60 sequences of the isolates  
40 available at that time. Isolates belonging to cpn60 subgroup D corresponded to three distinct  
41 genome species: genome species 8, 9 and 10 (6).

42 In addition to the characteristic change in microbiota, and elevated pH, sialidase activity  
43 in vaginal fluid is a diagnostic marker of BV (7, 8). Sialidase enzymes cleave the glycosidic  
44 linkages of sialic acids from terminal glycans including vaginal mucins, immunoglobulin A  
45 molecules, and epithelial cell surface glycoproteins (9, 10). Activity on the latter may be related  
46 to the adhesion of bacteria to epithelial cells; the initial step in biofilm formation (11).  
47 Previously, we have demonstrated that sialidase activity is almost exclusively confined to *G.*  
48 *piovii* and *Gardnerella* genome species 3 (cpn60 subgroup B) (12).

49 A putative sialidase gene, *nanHI* (sialidase A) identified in *Gardnerella* spp. and was  
50 initially thought to be the gene responsible for sialidase activity (13). Although *nanHI* appears to  
51 be present in all sialidase positive strains, it is also found in sialidase activity negative strains

52 (12). This observation combined with the lack of signal peptide on the NanH1 proteins suggests  
53 that this protein is an intracellular enzyme, likely involved in manipulation of nutritional  
54 substrates as is the case in many bacteria (14). The discrepancy between *nanH1* presence and  
55 enzyme activity led to the recognition of two additional sialidase genes (*nanH2* and *nanH3*) in  
56 some *Gardnerella* isolates (15). The authors of this report concluded that NanH2 and NanH3 are  
57 extracellular and that they are the proteins responsible for sialidase activity detected in vaginal  
58 fluid. Cell wall anchored proteins with sialidase activity in other species have been found to be  
59 involved in adhesion to mucosal surfaces and biofilm initiation as well as carbohydrate  
60 assimilation (16–19).

61 Interestingly, *nanH3* contains a homopolymeric tract of cytosine residues. Genomic  
62 regions that contain short, homogenous or heterogenous repeats are susceptible to slipped-strand  
63 mispairing in which the length of the repeat region can change with each replication (20). The  
64 result of this modulation is phase variation: a reversible process in which the expression of the  
65 encoded protein can be rapidly switched on and off (21). Phase variation in cell surface proteins  
66 can result in immune evasion and alteration of biofilm phenotypes (22, 23).

67 Here we determined the distribution of genes encoding cell-wall associated sialidases  
68 NanH2 and NanH3 in the context of newly reclassified *Gardnerella* spp. and demonstrated that  
69 *nanH3* is subject to slipped-strand mispairing.

70

## 71 **Methods**

### 72 **Protein domain identification and sequence alignment**

73 DNA and protein sequence alignments were performed with Clustal Omega  
74 (EMBL\_EBI) and NCBI BLAST (basic local alignment search tool). InterproScan

75 (<https://www.ebi.ac.uk/interpro/>) and SignalP was used to predict the location of functional  
76 domains signal peptides (24).

### 77 **Bacterial strains and culture conditions**

78 *Gardnerella* strains (n = 112) from a previously described culture collection were used in  
79 the study (12). Sialidase activity for all isolates (12), and whole genome sequences for 33 of  
80 these isolates (25) were previously determined. Complete strain information and sequence  
81 accessions are provided in Table S1.

82 *Gardnerella* isolates were grown on Columbia Sheep Blood Agar (BBL, Becton,  
83 Dickinson and Company, Sparks, MD, USA) plates incubating at 37°C for 48 hours with  
84 anaerobic BD GasPak EZ (Becton, Dickinson and Company, Sparks, MD, USA). For broth  
85 cultures a few colonies from the plate were collected with a 10 µl inoculation loop and used to  
86 inoculate NYC III (ATCC 1685 medium; per litre: 2.4g HEPES, 15 g Proteose peptone, 3.8 g  
87 Yeast extract, 5 g NaCl, 5 g Glucose). Broth cultures were incubated at 37°C for 48 hours in  
88 anaerobic conditions.

### 89 **PCR screen for *nanH3***

90 Genomic DNA was purified from broth cultures using a modified salting-out procedure  
91 (26). All DNA extracts were initially tested by PCR for the universal cpn60 barcode to confirm  
92 the quality of the DNA.

93 To screen isolates for the presence of *nanH3*, PCR primers were designed based on  
94 multiple sequence alignments of 15 *nanH3* sequences obtained from the Integrated Microbial  
95 Genomes database (<https://img.jgi.doe.gov/>). Degenerate primers were designed to account for  
96 sequence variability within the gene sequence and to amplify a product of 375 bp in length  
97 (JH0684: 5'-GTT GTA GAR CTT TCT GAT GG-3', JH0685: 5'-YRY TAT TAT CGC CCT

98 CAT ATA-3'). PCR reactions contained 1 × PCR Buffer (0.2 M Tris-HCl at pH 8.4, 0.5 M KCl),  
99 2.5 μM MgCl<sub>2</sub>, 0.40 μM dNTP, 0.20 μM forward primer, 0.20 μM reverse primer, 2 U Taq DNA  
100 Polymerase, ultrapure water and 2 μl of template DNA in a final volume of 50 μl. PCR reactions  
101 were conducted using the following thermocycling parameters in a Mastercycler Pro 6321  
102 (Eppendorf AG, Hamburg, Germany): 94 °C for 3 minutes, 40 cycles of (94 °C for 30 seconds,  
103 55 °C for 30 seconds, 72 °C for 30 seconds), 72 °C for 1 minute, hold at 20 °C. PCR products  
104 were visualized under UV light on a 1.0 % agarose gel containing ethidium bromide.

### 105 **Homopolymer PCR, cloning and sequencing**

106 To determine the length of the homopolymer region of *nanH3*, four strains (W11,  
107 VN014, VN015, NR032) were cultured on Columbia Agar plates with 5% Sheep Blood. Primers  
108 JH0780 (5'-ATG ATT GGA ACA GCG CAT AAA G-3') and JH0781 (5'-GAT TTC TCC ACC  
109 TAC AGT TAC C-3') were designed to PCR amplify a region including basepairs 2-310 of the  
110 open reading frame of *nanH3*.

111 The DNA sequence (308 bp) was amplified by PCR in a Mastercycler Pro 6321  
112 (Eppendorf AG, Hamburg, Germany). The components of the PCR reaction mix (50 μl per  
113 reaction) were added to achieve final concentrations of 1×High Fidelity PCR buffer (60 mM  
114 Tris-SO<sub>4</sub> (pH 8.9), 18 mM (NH<sub>4</sub>)<sub>2</sub>SO<sub>4</sub>), 0.2 mM dNTP mix, 2 mM MgSO<sub>4</sub>, 1U Platinum High  
115 Fidelity (Hi-Fi) proof reading Taq polymerase (Invitrogen, Carlsbad, CA, USA). Two colonies  
116 of each *G. piovii* or genome sp. 3 strain were randomly picked and added to separate PCR  
117 reactions using sterile toothpicks. Thermocycling conditions included 35 cycles of denaturation  
118 at 94°C for 15 seconds, annealing at 55°C for 30 seconds, extension at 68°C for 1 minute, and  
119 final extension at 68°C for 5 minutes. PCR products were visualized on a 1% agarose gel. PCR

120 products were purified using QiaQuick PCR purification kit (Qiagen, Hilden, Germany) and  
121 purified PCR products were sequenced using the amplification primers (JH0780, JH0781).

122 To clarify the exact length of the homopolymer region, amplicons generated from the two  
123 colonies of each of the four strains were A-tailed in 10 µl reactions containing 1× Platinum PCR  
124 buffer (20 mM Tris HCl (pH 8.4), 50 mM KCl), 2 mM MgCl<sub>2</sub>, 0.5 mM dATP, 5 U Platinum Taq  
125 polymerase (Invitrogen, Carlsbad, CA, USA) and less than 500 ng of the purified PCR product.  
126 The reaction mixture was incubated at 72 °C for 20 minutes in Mastercycler Pro 6321  
127 (Eppendorf AG, Hamburg, Germany). End-modified PCR products were ligated into pGEM-T  
128 Easy vector (Promega, Madison, WI, USA). The vector-insert construct was used to transform  
129 chemically competent DH5α cells or OneShot Top 10 *E. coli* (Invitrogen, Carlsbad, CA, USA)  
130 and plated on LB/AMP/X-gal agar media. Ten white colonies were randomly selected from the  
131 transformants of each *Gardnerella* strain and transferred into LB + ampicillin broth. Cultures  
132 were grown overnight at 37 °C. Plasmid DNA was isolated using QiaPrep Spin Miniprep kit  
133 (Qiagen, Hilden, Germany). Plasmids were sequenced using vector primers T7 and SP6.

134

## 135 **Results**

### 136 **Distribution of extracellular sialidases in *Gardnerella* spp. isolates.**

137 Robinson et al. (15) had previously reported that sialidase activity was associated with  
138 the presence of either *nanH2* or *nanH3* in a collection of 34 *Gardnerella* isolates but did not  
139 report the species or subgroup affiliation. In order to confirm this observation and to reconcile  
140 the distribution of genes and activities with the new *Gardnerella* taxonomic framework (5), we  
141 queried 33 isolates in our culture collection for which whole genome sequence data and sialidase  
142 activity data were available (Table S1). The presence of the genes was assessed by aligning

143 *nanH2* of JCP8151B (ATJH01000056) and *nanH3* of W11 to the genome sequences using  
144 BLASTn. Sialidase activity was reported in 9/33 isolates (Table 1) and all nine were *G. piovii* or  
145 genome sp. 3 (cpn60 subgroup B). The intact ORF of *nanH3* was found in 8/9 sialidase activity  
146 positive isolates while *nanH2* was present in only 4/9 isolates. Three isolates possessed both  
147 *nanH2* and *nanH3* genes in their sequences. VN002 was sialidase activity positive but only  
148 *nanH2* was identified in the genome sequence. This isolate subsequently screen PCR positive for  
149 *nanH3* (see next section), suggesting that the gene was not included in the shotgun assembly of  
150 the genome, which consisted of multiple gap-containing scaffolds. None of the *G. vaginalis*, *G.*  
151 *swidsinskii*, *G. leopoldi* or subgroup D isolates were sialidase positive and none contained *nanH2*  
152 or *nanH3*.

### 153 **Correlation of *nanH3* with sialidase activity**

154 In order to examine further the relationship of *nanH3* to sialidase activity, 112  
155 *Gardnerella* spp. isolates for which sialidase activity data was available (12) was screened for  
156 the presence of *nanH3* using PCR primers JH0684/JH0685 (Figure 1). Sialidase activity was  
157 detected in 32/33 *G. piovii* isolates and 3/33 *G. vaginalis* isolates. All sialidase activity positive  
158 isolates were positive for *nanH3* by PCR with the exception of one *G. piovii* isolate (WP027) that  
159 was PCR negative. Unfortunately, genome sequence data was not available for WP027.

### 160 **Characterization of a poly-C homopolymer in *nanH3***

161 The protein sequences encoded by all *nanH3* sequences were predicted to encode a signal  
162 peptide (amino acids 1-32), a sialidase domain (amino acids 181-852 in W11) and a C-terminal  
163 transmembrane domain (amino acids 783-805 in W11). We observed a poly-cytosine  
164 homopolymer (8-14 cytosines) in all *nanH3* genes identified in the whole genome sequences,  
165 approximately 100 bases from the start of the open reading frame. The homopolymer occurred



166 immediately following the region of the sequence predicted to encode the signal peptide (amino  
167 acids 1-32) (Figure 2). When Sanger sequencing was performed on PCR products corresponding  
168 to nucleotides 2-310 of *nanH3* amplified from genomic DNA extracted from broth cultures of  
169 strain W11, the results suggested variable lengths of the homopolymer. Specifically, clean data  
170 was obtained upstream of the poly-C tract but sequence 3' to that region was indicative of a  
171 mixed template (Figure S1). Since it has been demonstrated that simple repeats such as  
172 homopolymers can be subject to slipped strand mispairing, we set out to determine if the  
173 homopolymer region of *nanH3* varied in length within and between strains of *G. piotii*.

174 PCR product libraries were made from two colonies each of isolates W11, VN014,  
175 VN015 and NR032 (8 clone libraries total). Plasmids were purified from 10 colonies from each  
176 of the 8 clone libraries and sequenced. High quality sequence data was obtained from 15, 14, 18  
177 and 16 clones from the W11, VN014, VN015 and NR032 libraries, respectively. Example results  
178 are shown in Figure S2. The length of the homopolymer varied from 8 to 14 among all strains  
179 (Table 2), and within each strain the sequence flanking the homopolymer was identical. *In silico*  
180 translation of the encoded polypeptides showed that most homopolymer lengths resulted in a  
181 truncated peptide (37-43 amino acids), while full-length protein (812 aa) would result when there  
182 were nine or twelve cytosines in the homopolymer region. Interestingly, the most common  
183 length of the poly-C region varied among strains. C<sub>10</sub> was most common in VN014 and VN015,  
184 while C<sub>9</sub> and C<sub>12</sub> were most frequently observed in NR032 and W11, respectively. VN015 had  
185 the highest number of homopolymer variants (Figure 3). A second open reading frame within  
186 the *nanH3* open reading frame was also identified, corresponding to amino acids Met<sub>397</sub>-Tyr<sub>812</sub> of  
187 the NanH3 protein. These 415 aa polypeptides encompass part of the predicted sialidase domain,  
188 and the C-terminal transmembrane domain but lacks a signal peptide.

189

## 190 **Discussion**

191         The genus *Gardnerella* is known as a hallmark of BV and their abundance is used as a  
192 criterion for the laboratory diagnosis of the condition (27). In addition to participating in biofilms  
193 that coat epithelial cells in BV, *Gardnerella* spp. produce enzymes and a cholesterol dependent  
194 cytolysin that contribute to degrading the protective barriers of the vaginal mucosa (28).  
195 Sialidase activity can provide nutrients by releasing sialic acid moieties from vaginal sialylated  
196 mucins (10), altering the physical properties of vaginal mucus. Removal of sialic acid residues  
197 from epithelial cell surface glycans can facilitate bacterial adhesion and initiation of biofilm  
198 formation (11, 16, 18, 19).

199         The two putative sialidase genes (*nanH2* and *nanH3*) in *Gardnerella* spp. have been  
200 demonstrated to encode proteins with high enzymatic potency (15). Taken together, the result of  
201 this study and our current study show that *nanH3* is more common and *nanH2* is virtually never  
202 found without *nanH3*. It is now clear that extracellular sialidase activity is a property of *G. piovii*  
203 and the closely related *Gardnerella* genome sp. 3. We found two occurrences of sialidase  
204 positive, *nanH3* positive *G. vaginalis* isolates (2/33 isolates screened), and Vaneechoutte et al.  
205 (5) reported sialidase activity in 1/4 *G. vaginalis* isolates used in the amendment of the genus.  
206 This infrequent prevalence of *nanH3* in *G. vaginalis* could be the result of lateral gene transfer  
207 from *G. piovii* since these species co-exist in the same microbiome and women are usually  
208 colonized by more than one species (6, 29, 30).

209         All of the *nanH3* sequences we examined were predicted to encode a signal peptide, a  
210 sialidase domain and a C-terminal membrane domain, suggesting a cell-wall tethered protein,  
211 similar to SiaBb2 of *Bifidobacterium bifidum*, which enhances adhesion to intestinal mucosal

212 surfaces and contributes to carbohydrate assimilation (19). Interestingly, the NanH3 of  
213 *Gardnerella* strain JCP8151B investigated by Robinson et al. was reported to lack a signal  
214 peptide. When we examined the sequence upstream of *nanH3* in the JCP8151B sequence  
215 (Genbank accession ATJH01000033), we found that there is an alternative start codon, and the  
216 homopolymer we observed in all of our sequences. The frame-shift that resulted in the  
217 annotation of the gene without the signal peptide-encoding N-terminus is caused by the  
218 homopolymer.

219         Genomic regions that contain homogenous or heterogenous repeats are prone to changes  
220 in length of the repeat at each replication due to slipped strand mispairing (20). This can lead to  
221 consequent changes in the transcription or translation product of a gene depending on whether  
222 the slipped strand mispairing occurs within the open reading frame or in extragenic regions such  
223 as promoter sequences. Phase variation results when slipped strand mispairing creates “on” and  
224 “off” states of expression of a protein. Phase variation of cell surface proteins has been  
225 documented in many bacterial species including *Neisseria* spp. (31–33), *Salmonella* spp. (34–  
226 36), *Treponema pallidum* (37, 38) and *Helicobacter pylori* (23). It was first described in the *opa*  
227 genes that encode opacity surface proteins of *Neisseria* spp. (39). The *opa* genes contain CTCTT  
228 pentamer repeats within the signal peptide encoding region and the expression of the Opa protein  
229 is regulated by slipped-strand mispairing. With six, nine or twelve CTCTT repeats the initiation  
230 codon is in frame with the remaining *opa* gene translating the Opa protein. Four or eight coding  
231 repeats makes the initiation codon out of frame with rest of the *opa* codons. The phase “on” state  
232 allows them to adhere to specific surface receptors on host cells (40).

233         Our results clearly show variation of the homopolymer length among *Gardnerella piovii*  
234 within colonies growing on agar, with anywhere from 8 to 14 C’s observed. The effect of this

235 change would be a mixture of cells with translation of NanH3 on or off. Why would *Gardnerella*  
236 *piotii* have a sialidase subject to phase variation? Two possible reasons are immune evasion and  
237 cell adhesion (biofilm initiation and dispersal).

238 Although BV is often referred to as a non-inflammatory condition because of the lack of  
239 typical clinical signs of inflammation (leukocyte infiltration, pain, redness, swelling), there is  
240 evidence of a host immune response to bacteria associated with BV, including *Gardnerella* spp..  
241 IgA specific for *Gardnerella* produced vaginolysin has been detected in women with clinical  
242 signs of BV (41), and IgA levels correlate with IL-8 expression in vaginal secretions (42).  
243 *Gardnerella* has also been shown to stimulate pro-inflammatory cytokines *in vitro* (43).  
244 Balancing this inflammatory response are the actions of bacterial enzymes like prolidases and  
245 sialidases that can degrade the effectors of inflammation. Whether there is a specific host  
246 response to NanH3 remains to be determined.

247 The initial step in biofilm formation is adhesion, which in the case of BV associated  
248 biofilms is to epithelial cells. *Streptococcus pneumoniae* surface proteins with sialidase activity  
249 have been shown to reveal carbohydrate ligands for bacterial adhesion to host cells (16).  
250 Similarly, Soong et al. (17) showed that a cell wall associated sialidase of *Pseudomonas*  
251 *aeruginosa* plays a critical role in facilitating respiratory mucosa infection through biofilm  
252 formation. Specific antibodies against *B. bifidum* SiaBb2, a cell wall tethered sialidase, inhibit  
253 adhesion to cells (19). The involvement of *Gardnerella* sialidases in adhesion has not been  
254 demonstrated directly, although it has been reported that inhibition of sialidase activity in  
255 *Gardnerella* strain JCP8066 by an antiviral drug (Zanamavir) resulted in reduction of adherence  
256 to vaginal epithelial cells *in vitro* (11). *Gardnerella* spp. can form multi-species biofilms *in vitro*  
257 (44) and although “*Gardnerella vaginalis*” has been shown to participate in multispecies

258 biofilms with other BV associated bacteria *in vivo* (45, 46), it is not yet known how each of the  
259 *Gardnerella* spp. participate in this process. Interestingly, *G. piotii* and *Gardnerella* genome sp.  
260 3 (cpn60 subgroup B) have been previously associated with “intermediate” grades of vaginal  
261 dysbiosis (6, 29, 47, 48) and may contribute to transition from eubiosis to dysbiosis and enhance  
262 colonization by other BV associated anaerobes. Phase variation in a cell surface associated  
263 sialidase enzyme might be critical for turning on or off the initial adhesion of *Gardnerella* to  
264 epithelial cells and thus the cascade of events following that result in the biofilm covered “clue  
265 cells” typical of BV (49).

266         It seems likely that some of the NanH3 protein produced by *G. piotii* does not remain  
267 tethered to the cell surface, as is the case with *S. pneumoniae* (50), since the sequence upstream  
268 of the C-terminal transmembrane domain may be susceptible to proteolytic cleavage, and  
269 heterologously expressed NanH3 lacking the transmembrane domain is active (15). Taken  
270 together, the activity of NanH3 while anchored to the cell surface or released into the  
271 extracellular environment, and the likelihood that it is subject to phase variation through slipped-  
272 strand mispairing, make this protein an intriguing puzzle for future study. Development of  
273 genetic tools to create mutants where NanH3 production is locked “on” or “off” would be a  
274 significant step toward understanding the role of this protein in the initiation and maintenance of  
275 vaginal dysbiosis.

276

## 277 **Acknowledgements**

278 This research was funded by a Natural Sciences and Engineering Council of Canada Discovery  
279 Grant to JEH. The authors are grateful to Champika Fernando for excellent technical assistance,  
280 and to all our colleagues in the Hill Lab for helpful discussions and feedback.

281

282 **References**

- 283 1. Nugent RP, Krohn MA, Hillier SL. 1991. Reliability of diagnosing bacterial vaginosis is  
284 improved by a standardized method of gram stain interpretation. *J Clin Microbiol* 29:297–  
285 301.
- 286 2. van de Wijgert JH, Borgdorff H, Verhelst R, Crucitti T, Francis S, Verstraelen H, Jespers  
287 V. 2014. The vaginal microbiota: what have we learned after a decade of molecular  
288 characterization? *PLoS One* 9:e105998.
- 289 3. Paramel Jayaprakash T, Schellenberg JJ, Hill JE. 2012. Resolution and characterization of  
290 distinct cpn60-based subgroups of *Gardnerella vaginalis* in the vaginal microbiota. *PLoS*  
291 *ONE* 7:e43009.
- 292 4. Ahmed A, Earl J, Retchless A, Hillier SL, Rabe LK, Cherpes TL, Powell E, Janto B, Eutsey  
293 R, Hiller NL, Boissy R, Dahlgren ME, Hall BG, Costerton JW, Post JC, Hu FZ, Ehrlich  
294 GD. 2012. Comparative genomic analyses of 17 clinical isolates of *Gardnerella vaginalis*  
295 provide evidence of multiple genetically isolated clades consistent with subspeciation into  
296 genovars. *J Bacteriol* 194:3922–37.
- 297 5. Vaneechoutte M, Guschin A, Van Simaey L, Gansemans Y, Van Nieuwerburgh F, Cools P.  
298 2019. Emended description of *Gardnerella vaginalis* and description of *Gardnerella*  
299 *leopoldii* sp. nov., *Gardnerella piovii* sp. nov. and *Gardnerella swidsinskii* sp. nov., with  
300 delineation of 13 genomic species within the genus *Gardnerella*. *Int J Syst Evol Microbiol*  
301 69:679–687.

- 302 6. Hill JE, Albert AYK. 2019. Resolution and co-occurrence patterns of *Gardnerella*  
303 *leopoldii*, *Gardnerella swidsinskii*, *Gardnerella piotii* and *Gardnerella vaginalis* within the  
304 vaginal microbiome. *Infect Immun* 87:e00532-19.
- 305 7. McGregor JA, French JI, Jones W, Milligan K, McKinney PJ, Patterson E, Parker R. 1994.  
306 Bacterial vaginosis is associated with prematurity and vaginal fluid mucinase and sialidase:  
307 results of a controlled trial of topical clindamycin cream. *Am J Obstet Gynecol* 170:1048–  
308 1059.
- 309 8. Myziuk L, Romanowski B, Johnson SC. 2003. BVBlue test for diagnosis of bacterial  
310 vaginosis. *J Clin Microbiol* 41:1925–8.
- 311 9. Briselden AM, Moncla BJ, Stevens CE, Hillier SL. 1992. Sialidases (neuraminidases) in  
312 bacterial vaginosis and bacterial vaginosis-associated microflora. *J Clin Microbiol* 30:663–  
313 6.
- 314 10. Lewis WG, Robinson LS, Gilbert NM, Perry JC, Lewis AL. 2013. Degradation, foraging,  
315 and depletion of mucus sialoglycans by the vagina-adapted Actinobacterium *Gardnerella*  
316 *vaginalis*. *J Biol Chem* 288:12067–79.
- 317 11. Govinden G, Parker JL, Naylor KL, Frey AM, Anumba DOC, Stafford GP. 2018. Inhibition  
318 of sialidase activity and cellular invasion by the bacterial vaginosis pathogen *Gardnerella*  
319 *vaginalis*. *Arch Microbiol* 200:1129–1133.
- 320 12. Schellenberg JJ, Paramel Jayaprakash T, Withana Gamage N, Patterson MH, Vaneechoutte  
321 M, Hill JE. 2016. *Gardnerella vaginalis* subgroups defined by cpn60 sequencing and  
322 sialidase activity in isolates from Canada, Belgium and Kenya. *PLoS One* 11:e0146510.

- 323 13. Santiago GL, Deschaght P, El Aila N, Kiama TN, Verstraelen H, Jefferson KK,  
324 Temmerman M, Vaneechoutte M. 2011. *Gardnerella vaginalis* comprises three distinct  
325 genotypes of which only two produce sialidase. *Am J Obstet Gynecol* 204:450.e1–7.
- 326 14. Corfield T. 1992. Bacterial sialidases—roles in pathogenicity and nutrition. *Glycobiology*  
327 2:509–521.
- 328 15. Robinson LS, Schwebke J, Lewis WG, Lewis AL. 2019. Identification and characterization  
329 of NanH2 and NanH3, enzymes responsible for sialidase activity in the vaginal bacterium  
330 *Gardnerella vaginalis*. *J Biol Chem* 294:5230–5245.
- 331 16. Navarre WW, Schneewind O. 1999. Surface proteins of Gram-positive bacteria and  
332 mechanisms of their targeting to the cell wall envelope. *Microbiol Mol Biol Rev MMBR*  
333 63:174–229.
- 334 17. Soong G, Muir A, Gomez MI, Waks J, Reddy B, Planet P, Singh PK, Kanetko Y, Wolfgang  
335 MC, Hsiao Y-S, Tong L, Prince A. 2006. Bacterial neuraminidase facilitates mucosal  
336 infection by participating in biofilm production. *J Clin Invest* 116:2297–2305.
- 337 18. Parker D, Soong G, Planet P, Brower J, Ratner AJ, Prince A. 2009. The NanA  
338 neuraminidase of *Streptococcus pneumoniae* is involved in biofilm formation. *Infect*  
339 *Immun* 77:3722–30.
- 340 19. Nishiyama K, Yamamoto Y, Sugiyama M, Takaki T, Urashima T, Fukiya S, Yokota A,  
341 Okada N, Mukai T. 2017. *Bifidobacterium bifidum* extracellular sialidase enhances  
342 adhesion to the mucosal surface and supports carbohydrate assimilation. *MBio* 8.



- 343 20. Woude MW van der, Bäumlér AJ. 2004. Phase and antigenic variation in bacteria. Clin  
344 Microbiol Rev 17:581–611.
- 345 21. Phillips ZN, Tram G, Seib KL, Attack JM. 2019. Phase-variable bacterial loci: how bacteria  
346 gamble to maximise fitness in changing environments. Biochem Soc Trans 47:1131–1141.
- 347 22. Seib KL, Jen FE-C, Scott AL, Tan A, Jennings MP. 2017. Phase variation of DNA  
348 methyltransferases and the regulation of virulence and immune evasion in the pathogenic  
349 *Neisseria*. Pathog Dis 75.
- 350 23. Bergman M, Del Prete G, van Kooyk Y, Appelmelk B. 2006. *Helicobacter pylori* phase  
351 variation, immune modulation and gastric autoimmunity. 2. Nat Rev Microbiol 4:151–159.
- 352 24. Nielsen H, Tsigiros KD, Brunak S, von Heijne G. 2019. A brief history of protein sorting  
353 prediction. Protein J 38:200–216.
- 354 25. Khan S, Vancuren SJ, Hill JE. 2020. A generalist lifestyle allows rare *Gardnerella* spp. to  
355 persist at low levels in the vaginal microbiome. bioRxiv 2020.08.25.267146.
- 356 26. Martin-Platero AM, Valdivia E, Maqueda M, Martínez-Bueno M. 2007. Fast, convenient,  
357 and economical method for isolating genomic DNA from lactic acid bacteria using a  
358 modification of the protein “salting-out” procedure. Anal Biochem 366:102–4.
- 359 27. Nugent RP, Krohn MA, Hillier SL. 1991. Reliability of diagnosing bacterial vaginosis is  
360 improved by a standardized method of gram stain interpretation. J Clin Microbiol 29:297–  
361 301.

- 362 28. Schellenberg JJ, Patterson MH, Hill JE. 2017. *Gardnerella vaginalis* diversity and ecology  
363 in relation to vaginal symptoms. Res Microbiol doi:10.1016/j.resmic.2017.02.011.
- 364 29. Balashov SV, Mordechai E, Adelson ME, Gygax SE. 2014. Identification, quantification  
365 and subtyping of *Gardnerella vaginalis* in noncultured clinical vaginal samples by  
366 quantitative PCR. J Med Microbiol 63:162–75.
- 367 30. Albert AY, Chaban B, Wagner EC, Schellenberg JJ, Links MG, van Schalkwyk J, Reid G,  
368 Hemmingsen SM, Hill JE, Money D. 2015. A study of the vaginal microbiome in healthy  
369 Canadian women utilizing cpn60-based molecular profiling reveals distinct *Gardnerella*  
370 subgroup community state types. PLoS One 10:e0135620.
- 371 31. Bayliss CD, Hoe JC, Makepeace K, Martin P, Hood DW, Moxon ER. 2008. *Neisseria*  
372 *meningitidis* escape from the bactericidal activity of a monoclonal antibody is mediated by  
373 phase variation of IgtG and enhanced by a mutator phenotype. Infect Immun 76:5038–5048.
- 374 32. Apicella MA, Shero M, Jarvis GA, Griffiss JM, Mandrell RE, Schneider H. 1987.  
375 Phenotypic variation in epitope expression of the *Neisseria gonorrhoeae*  
376 lipooligosaccharide. Infect Immun 55:1755–1761.
- 377 33. van Putten JP. 1993. Phase variation of lipopolysaccharide directs interconversion of  
378 invasive and immuno-resistant phenotypes of *Neisseria gonorrhoeae*. EMBO J 12:4043–  
379 4051.
- 380 34. Lederberg J, Iino T. 1956. Phase variation in *Salmonella*. Genetics 41:743–757.

- 381 35. Silverman M, Zieg J, Hilmen M, Simon M. 1979. Phase variation in *Salmonella*: genetic  
382 analysis of a recombinational switch. Proc Natl Acad Sci 76:391–395.
- 383 36. Bonifield HR, Hughes KT. 2003. Flagellar phase variation in *Salmonella enterica* is  
384 mediated by a posttranscriptional control mechanism. J Bacteriol 185:3567–3574.
- 385 37. Fraser CM, Norris SJ, Weinstock GM, White O, Sutton GG, Dodson R, Gwinn M, Hickey  
386 EK, Clayton R, Ketchum KA, Sodergren E, Hardham JM, McLeod MP, Salzberg S,  
387 Peterson J, Khalak H, Richardson D, Howell JK, Chidambaram M, Utterback T, McDonald  
388 L, Artiach P, Bowman C, Cotton MD, Fujii C, Garland S, Hatch B, Horst K, Roberts K,  
389 Sandusky M, Weidman J, Smith HO, Venter JC. 1998. Complete genome sequence of  
390 *Treponema pallidum*, the syphilis spirochete. Science 281:375–388.
- 391 38. Pinto M, Borges V, Antelo M, Pinheiro M, Nunes A, Azevedo J, Borrego MJ, Mendonça J,  
392 Carpinteiro D, Vieira L, Gomes JP. 2016. Genome-scale analysis of the non-cultivable  
393 *Treponema pallidum* reveals extensive within-patient genetic variation. 1. Nat Microbiol  
394 2:1–11.
- 395 39. Stern A, Brown M, Nickel P, Meyer TF. 1986. Opacity genes in *Neisseria gonorrhoeae*:  
396 Control of phase and antigenic variation. Cell 47:61–71.
- 397 40. Stern A, Nickel P, Meyer TF, So M. 1984. Opacity determinants of *Neisseria gonorrhoeae*:  
398 Gene expression and chromosomal linkage to the gonococcal pilus gene. Cell 37:447–456.
- 399 41. Cauci S, Scrimin F, Driussi S, Ceccone S, Monte R, Fant L, Quadrifoglio F. 1996. Specific  
400 immune response against *Gardnerella vaginalis* hemolysin in patients with bacterial  
401 vaginosis. Am J Obstet Gynecol 175:1601–5.

- 402 42. Cauci S, Driussi S, Guaschino S, Isola M, Quadrifoglio F. 2002. Correlation of local  
403 Interleukin-1beta levels with specific IgA response against *Gardnerella vaginalis* cytolysin  
404 in women with bacterial vaginosis. *Am J Reprod Immunol* 47:257–264.
- 405 43. Eade CR, Diaz C, Wood MP, Anastos K, Patterson BK, Gupta P, Cole AL, Cole AM. 2012.  
406 Identification and characterization of bacterial vaginosis-associated pathogens using a  
407 comprehensive cervical-vaginal epithelial coculture assay. *PLoS One* 7:e50106.
- 408 44. Khan S, Voordouw MJ, Hill JE. 2019. Competition among *Gardnerella* subgroups from the  
409 human vaginal microbiome. *Front Cell Infect Microbiol* 9:374.
- 410 45. Machado A, Cerca N. 2015. Influence of biofilm formation by *Gardnerella vaginalis* and  
411 other anaerobes on bacterial vaginosis. *J Infect Dis* 212:1856–61.
- 412 46. Machado D, Castro J, Palmeira-de-Oliveira A, Martinez-de-Oliveira J, Cerca N. 2015.  
413 Bacterial vaginosis biofilms: Challenges to current therapies and emerging solutions. *Front*  
414 *Microbiol* 6:1528.
- 415 47. Hilbert DW, Schuyler JA, Adelson ME, Mordechai E, Sobel JD, Gyax SE. 2017.  
416 *Gardnerella vaginalis* population dynamics in bacterial vaginosis. *Eur J Clin Microbiol*  
417 *Infect Dis* <https://doi.org/10.1007/s10096-017-2933-8>.
- 418 48. Shipitsyna E, Krysanova A, Khayrullina G, Shalepo K, Savicheva A, Guschin A, Unemo  
419 M. 2019. Quantitation of all four *Gardnerella vaginalis* clades detects abnormal vaginal  
420 microbiota characteristic of bacterial vaginosis more accurately than putative *G. vaginalis*  
421 sialidase A gene count. *Mol Diagn Ther* 23:139–147.

- 422 49. Simoes JA, Discacciati MG, Brolazo EM, Portugal PM, Dini DV, Dantas MC. 2006.  
423 Clinical diagnosis of bacterial vaginosis. *Int J Gynaecol Obstet* 94:28–32.
- 424 50. Lock RA, Paton JC, Hansman D. 1988. Purification and immunological characterization of  
425 neuraminidase produced by *Streptococcus pneumoniae*. *Microb Pathog* 4:33–43.
- 426

427

428 **Table 1.** Distribution of *nanH2* and *nanH3* genes in *Gardnerella* spp. whole genome sequences

| Isolate | cpn60 Subgroup        | Species             | Sialidase activity <sup>1</sup> | <i>nanH2</i> | <i>nanH3</i>   |
|---------|-----------------------|---------------------|---------------------------------|--------------|----------------|
| GH007   | B                     | <i>G. piovii</i>    | +                               | +            | +              |
| GH019   |                       | <i>G. piovii</i>    | +                               | -            | +              |
| GH020   |                       | <i>G. piovii</i>    | +                               | -            | +              |
| GH22    |                       | <i>G. piovii</i>    | +                               | +            | +              |
| N170    |                       | Genome species 3    | +                               | -            | +              |
| NR026   |                       | Genome species 3    | +                               | -            | +              |
| VN002   |                       | <i>G. piovii</i>    | +                               | +            | - <sup>2</sup> |
| N144    |                       | Genome species 3    | +                               | +            | +              |
| W11     |                       | Genome species 3    | +                               | -            | +              |
| GH005   |                       | A                   | <i>G. leopoldii</i>             | -            | -              |
| NR015   | Unknown               |                     | -                               | -            | -              |
| NR016   | <i>G. swidsinskii</i> |                     | -                               | -            | -              |
| NR017   | <i>G. leopoldii</i>   |                     | -                               | -            | -              |
| NR019   | <i>G. leopoldii</i>   |                     | -                               | -            | -              |
| NR020   | <i>G. swidsinskii</i> |                     | -                               | -            | -              |
| NR021   | <i>G. swidsinskii</i> |                     | -                               | -            | -              |
| VN003   | <i>G. leopoldii</i>   |                     | -                               | -            | -              |
| WP021   | <i>G. swidsinskii</i> |                     | -                               | -            | -              |
| WP022   | <i>G. swidsinskii</i> |                     | -                               | -            | -              |
| NR010   | <i>G. leopoldii</i>   |                     | -                               | -            | -              |
| N072    | <i>G. swidsinskii</i> |                     | -                               | -            | -              |
| GH021   | C                     |                     | <i>G. vaginalis</i>             | -            | -              |
| NR001   |                       | <i>G. vaginalis</i> | -                               | -            | -              |
| NR037   |                       | <i>G. vaginalis</i> | -                               | -            | -              |
| NR038   |                       | <i>G. vaginalis</i> | -                               | -            | -              |
| NR039   |                       | <i>G. vaginalis</i> | -                               | -            | -              |
| WP023   |                       | <i>G. vaginalis</i> | -                               | -            | -              |
| N165    |                       | <i>G. vaginalis</i> | -                               | -            | -              |
| GH015   |                       | <i>G. vaginalis</i> | -                               | -            | -              |
| NR003   | D                     | Genome sp. 8        | -                               | -            | -              |
| NR047   |                       | Unknown             | -                               | -            | -              |
| WP012   |                       | Genome sp. 9        | -                               | -            | -              |
| N160    |                       | Genome sp. 10       | -                               | -            | -              |

429 <sup>1</sup>Previously determined (12)

430 <sup>2</sup>PCR positive for *nanH3*

431

432

433

434 **Table 2.** Homopolymer length variants in *Gardnerella piovii* and genome sp. 3 isolates.

| Isolate | Homopolymer sequence               | Predicted peptide length (amino acids) <sup>1</sup> |
|---------|------------------------------------|-----------------------------------------------------|
| W11     | CAACTA- C <sub>11</sub> -ATGAACAAA | 43                                                  |
|         | CAACTA- C <sub>12</sub> -ATGAACAAA | 812                                                 |
|         | CAACTA- C <sub>13</sub> -ATGAACAAA | 38                                                  |
|         | CAACTA- C <sub>14</sub> -ATGAACAAA | 44                                                  |
| VN014   | CAACTA- C <sub>9</sub> -TCGAACAAA  | 812                                                 |
|         | CAACTA- C <sub>10</sub> -TCGAACAAA | 37                                                  |
|         | CAACTA- C <sub>11</sub> -TCGAACAAA | 43                                                  |
| VN015   | CAACTA- C <sub>9</sub> -TCGAACAAA  | 812                                                 |
|         | CAACTA- C <sub>10</sub> -TCGAACAAA | 37                                                  |
|         | CAACTA- C <sub>11</sub> -TCGAACAAA | 43                                                  |
|         | CAACTA- C <sub>12</sub> -TCGAACAAA | 812                                                 |
|         | CAACTA- C <sub>13</sub> - -GAACAAA | 43                                                  |
| NR032   | CAACTA- C <sub>8</sub> -ATGAACAAA  | 42                                                  |
|         | CAACTA- C <sub>9</sub> -ATGAACAAA  | 812                                                 |

435

436

437

438

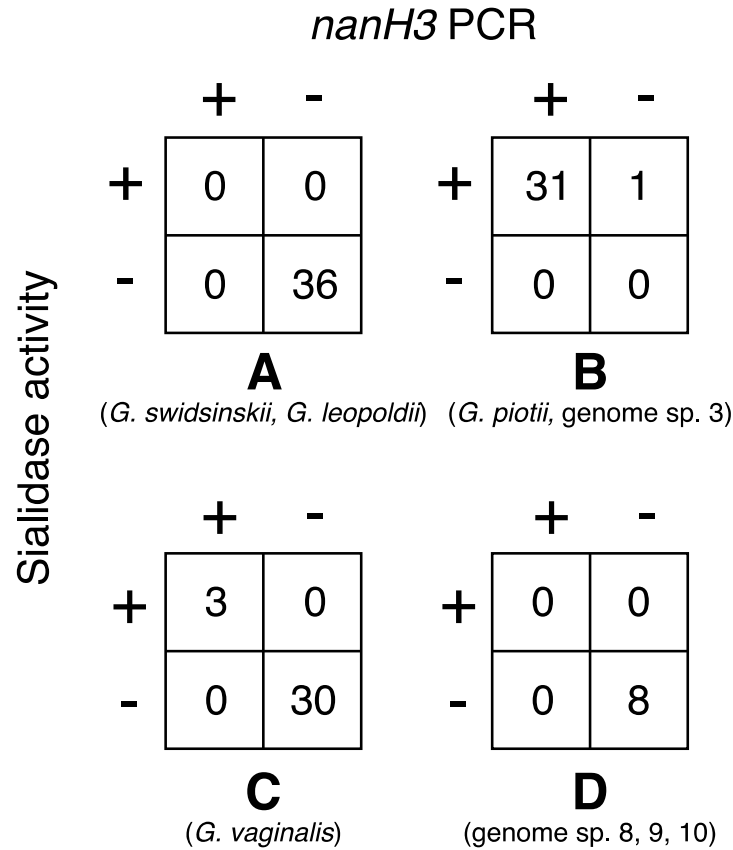

439

440 **Figure 1.** Correlation of *nanH3* and sialidase activity in 112 *Gardnerella* isolates. Numbers of  
 441 isolates positive or negative for sialidases activity and *nanH3* PCR. cpn60 subgroup affiliation  
 442 and species are indicated below each crosstab. Sialidase results were determined by Schellenberg  
 443 et al. (12).

444



445

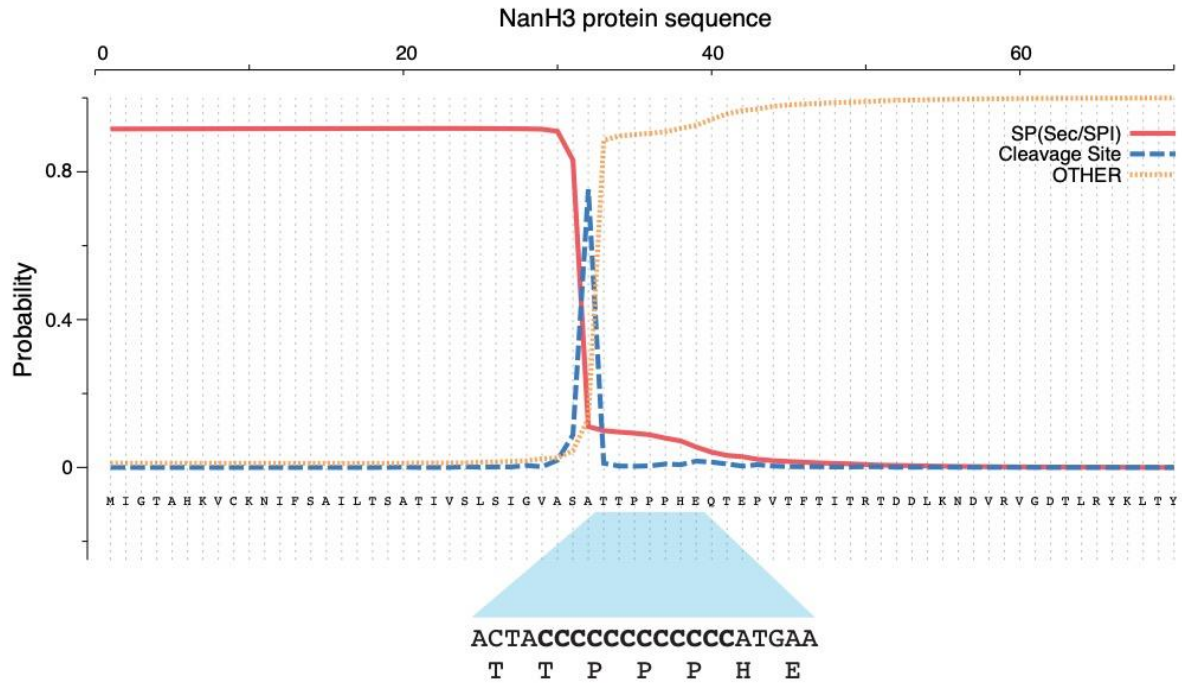

446

447 **Figure 2.** Location of predicted signal peptide, cleavage site and homopolymer in the *nanH3*  
448 gene of strain W11. Analysis was conducted with SignalP-5.0.

449

450

451

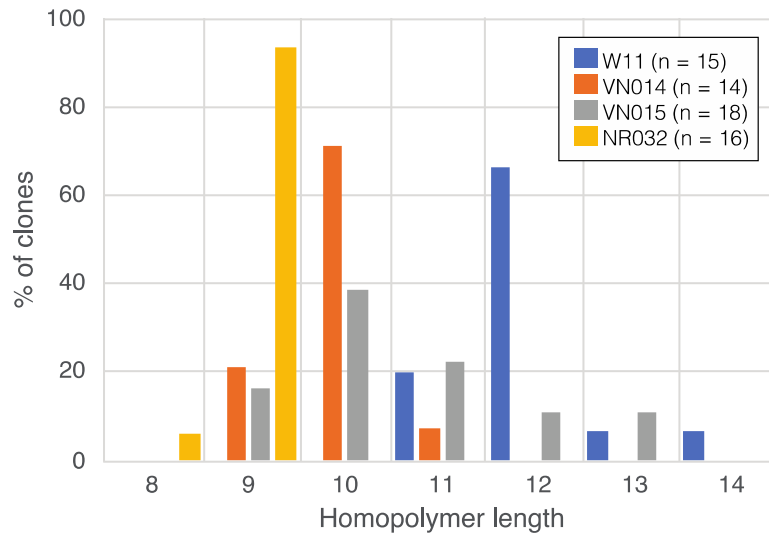

452

453 **Figure 3.** Frequencies of the homopolymer length variants in isolates W11, VN014, VN015 and

454 NR032.

455

456

457 **Supplemental Materials**

458

459 **Table S1.** *Gardnerella* strains used in the study, cpn60 subgroup affiliations, whole genome  
460 sequence accession numbers, and sialidase activity phenotypes.

461

462 **Figure S1.** Sequencing of PCR products amplified directly from colonies of isolate W11.

463 PCR was performed with primers flanking the homopolymer region as described in the methods.

464 In each electropherogram, after eleven peaks of cytosine, the sequencing signal shows multiple  
465 overlapping peaks suggesting the presence of multiple template sequences with different  
466 homopolymer lengths.

467

468 **Figure S2.** Electropherograms of the homopolymer regions in two W11 colonies. Colony 6 had  
469 individuals with 11, 12 and 13 C's in the homopolymeric region. Five out of eight colonies had  
470 12C's in the homopolymer region. Colony 8 had individuals with 11, 12 and 14 C's in the  
471 homopolymeric region. Five out of eight colonies had 12 C's in the homopolymer region.  
472 Having 12 C's makes the coding region in-frame. When there is 11,13 or 14 C's, a premature  
473 STOP codon is generated possibly making the protein truncated.

474

475
